# Supplementary material
Source: HighWire-hosted journal article supplement (https://bmjopen.bmj.com/content/7/9/e014419)
Supplement: inline-supplementary-material-2 [file inline-supplementary-material-2.pdf]

**Supplementary File 1: Process-Evaluation Plan for GoActive Intervention**

| <b>Component</b>             | <b>Process Evaluation Question</b>                                                                                                                                                                                      | <b>Data sources</b>                                                                                                                                   | <b>Tools/Procedures</b>                                                                                                                                                                                                                                                                                                                                                                                                                                                                                                                                                                                                                                                                                                                                                                                                |
|------------------------------|-------------------------------------------------------------------------------------------------------------------------------------------------------------------------------------------------------------------------|-------------------------------------------------------------------------------------------------------------------------------------------------------|------------------------------------------------------------------------------------------------------------------------------------------------------------------------------------------------------------------------------------------------------------------------------------------------------------------------------------------------------------------------------------------------------------------------------------------------------------------------------------------------------------------------------------------------------------------------------------------------------------------------------------------------------------------------------------------------------------------------------------------------------------------------------------------------------------------------|
| <b><i>Fidelity</i></b>       | <i>To what extent was the intervention implemented consistently and as planned?</i>                                                                                                                                     | <ul style="list-style-type: none"> <li>- Students</li> <li>- Mentors</li> <li>- Facilitators</li> <li>- Teachers</li> <li>- GoActive staff</li> </ul> | <p>Fidelity of implementation will be assessed utilizing an observation procedure*. This will include observing the encouragement and modelling of activities from mentors and leaders to students</p> <ul style="list-style-type: none"> <li>- T2 student website use: Google analytics on points uploaded, and hence, prizes redeemed</li> <li>- T2 mentor questionnaire</li> <li>- T2 mentor log book</li> <li>- T3 mentor focus groups</li> <li>- T3 facilitator questionnaire*</li> <li>- T3 facilitator focus groups/interviews*</li> <li>- T2 facilitator log book</li> <li>- T3 teacher questionnaire</li> <li>- T3 teacher focus groups</li> <li>- Field notes</li> <li>- Interview notes</li> <li>- Minutes of meetings</li> <li>- Emails</li> <li>- Logs (record keeping)</li> <li>- Reflections</li> </ul> |
| <b><i>Dose delivered</i></b> | <i>To what extent were the units within the intervention implemented?</i>                                                                                                                                               | <ul style="list-style-type: none"> <li>- Students</li> <li>- Mentors</li> <li>- Facilitators</li> <li>- Teachers</li> <li>- GoActive staff</li> </ul> | <ul style="list-style-type: none"> <li>- T2 student questionnaire</li> <li>- T2 student focus groups</li> <li>- T3 student individual interviews</li> <li>- T2 mentor questionnaire</li> <li>- T3 mentor focus groups</li> <li>- T2 mentor log book</li> <li>- T3 facilitator questionnaire*</li> <li>- T3 facilitator groups/interviews*</li> <li>- T2 facilitator log book</li> <li>- T3 teacher questionnaire</li> <li>- T3 teacher focus groups</li> <li>- Documentation of staff activities</li> <li>- Review of notes and other documents</li> <li>- Classroom observations*</li> </ul>                                                                                                                                                                                                                          |
| <b><i>Dose received</i></b>  | <p><i>Did students enjoy the GoActive activities?</i></p> <p><i>Were mentors, teachers and facilitators satisfied with the intervention?</i></p> <p><i>Were the GoActive staff satisfied with the intervention?</i></p> | <ul style="list-style-type: none"> <li>- Students</li> <li>- Mentors</li> </ul>                                                                       | <ul style="list-style-type: none"> <li>- T2 student website use: Google analytics on frequency and duration of website use, resources download and points upload statistics</li> <li>- T2 student questionnaire</li> <li>- T2 student focus groups</li> <li>- T3 student individual interviews</li> <li>- T2 mentor questionnaire</li> <li>- T2 mentor log book</li> </ul>                                                                                                                                                                                                                                                                                                                                                                                                                                             |

|                    |                                                                                                                                                       |                                                                                                                                                       |                                                                                                                                                                                                                                                                                                                                                                                                                                                                                                                                                                                                                                                        |
|--------------------|-------------------------------------------------------------------------------------------------------------------------------------------------------|-------------------------------------------------------------------------------------------------------------------------------------------------------|--------------------------------------------------------------------------------------------------------------------------------------------------------------------------------------------------------------------------------------------------------------------------------------------------------------------------------------------------------------------------------------------------------------------------------------------------------------------------------------------------------------------------------------------------------------------------------------------------------------------------------------------------------|
|                    |                                                                                                                                                       | <ul style="list-style-type: none"> <li>- Facilitators</li> <li>- Teachers</li> <li>- Go Active staff</li> </ul>                                       | <ul style="list-style-type: none"> <li>- T3 mentor focus groups</li> <li>- T3 facilitator questionnaire*</li> <li>- T3 facilitator focus groups*</li> <li>- T2 facilitator log book</li> <li>- T3 teacher questionnaire</li> <li>- T3 teacher focus groups</li> <li>- Field notes</li> <li>- Interview notes</li> <li>- Minutes of meetings</li> <li>- Emails</li> <li>- Logs</li> <li>- Reflections</li> <li>- Classroom observations*</li> </ul>                                                                                                                                                                                                     |
| <b>Reach</b>       | <i>Was the intervention delivered to at least 75% of Year 9 students?</i>                                                                             | <ul style="list-style-type: none"> <li>- Students</li> </ul>                                                                                          | <ul style="list-style-type: none"> <li>- T2 student questionnaire</li> </ul>                                                                                                                                                                                                                                                                                                                                                                                                                                                                                                                                                                           |
| <b>Recruitment</b> | <i>What procedures were followed to recruit schools and participants (students, teachers, mentors and facilitators) to the GoActive intervention?</i> | <ul style="list-style-type: none"> <li>- GoActive staff</li> <li>- Mentors</li> <li>- Students</li> </ul>                                             | <ul style="list-style-type: none"> <li>- £200 sporting equipment voucher for schools</li> <li>- Sports clothing for mentors</li> <li>Maintenance for students: <ul style="list-style-type: none"> <li>- Awards</li> <li>- Prizes</li> <li>- Competition</li> </ul> </li> </ul>                                                                                                                                                                                                                                                                                                                                                                         |
| <b>Context</b>     | <i>What were barriers and facilitators to implementing the GoActive intervention?</i>                                                                 | <ul style="list-style-type: none"> <li>- Students</li> <li>- Mentors</li> <li>- Facilitators</li> <li>- Teachers</li> <li>- GoActive staff</li> </ul> | <ul style="list-style-type: none"> <li>- T2 student questionnaire</li> <li>- T2 student focus groups</li> <li>- T3 student individual interview</li> <li>- T2 mentor questionnaire</li> <li>- T3 mentor focus groups</li> <li>- T2 mentor log book</li> <li>- T3 facilitator questionnaire*</li> <li>- T3 facilitator focus groups*</li> <li>- T2 facilitator log book</li> <li>- T2 teacher questionnaire</li> <li>- T3 teacher focus groups</li> <li>- Field notes</li> <li>- Interview notes</li> <li>- Minutes of meetings</li> <li>- Emails</li> <li>- Logs (record keeping)</li> <li>- Reflections</li> <li>- Classroom observations*</li> </ul> |

\*Ethics approval pending for these elements.
